# Supplementary material
Source: PubMed Central journal article supplement (PMC2952215)
Supplement: supp_M110.143248_jbc.M110.143248-1.pdf [file supp_M110.143248_jbc.M110.143248-1.pdf]

## Supplemental Figure S1.

Supplemental Figure S1. **Knockdown of ZIP14 decreases TBI uptake by wild-type HepG2 cells.** *A*, HepG2 cells were transfected with negative control or ZIP14 siRNA for 72 h prior to Western blot analysis for ZIP14 and actin as a lane loading control. *B*, Knockdown of ZIP14 decreases the uptake of TBI. HepG2 cells transfected with control or ZIP14 siRNA for 72 h were incubated with 100 nM <sup>55</sup>Fe-TF for 1 h. Cells were harvested and cell-associated radioactivity was determined by scintillation counting. The amount of TBI taken up by cells is expressed as pmol <sup>55</sup>Fe-TF/10<sup>6</sup> cells/hour. Data represent the mean ± SD of three independent experiments.

### Supplemental Experimental Procedures

*Cell culture*—HepG2 cells were maintained in Minimum Essential Medium Eagle (MEM) (Life Technologies) supplemented with 1.0 mM sodium pyruvate, 0.1 mM nonessential amino acids (Life Technologies) and 10% fetal bovine serum (FBS).

*<sup>55</sup>Fe-Tf uptake*—Cells grown in a 12-well plate were washed twice and equilibrated in DMEM with 20 mM Hepes (pH 7.4) for 15 min at 37 °C, 5% CO<sub>2</sub>. Wash medium was replaced with 0.5 ml of uptake medium containing 100 nM <sup>55</sup>Fe-Tf in DMEM supplemented with 20 mM Hepes (pH 7.4) and 2 mg/ml ovalbumin, pH 7.4. After 1 hour, cells were placed on ice, and externally bound <sup>55</sup>Fe-Tf was stripped with an acidic buffer (0.2 N acetic acid, 500 mM NaCl, 1 mM FeCl<sub>3</sub>) for 3 min. Cells were solubilized in 0.5 ml of solubilization detergent (0.1% Triton X-100, 0.1% NaOH). Lysates were mixed with 6 ml UniverSol scintillation fluid and the radioactivity was counted for 10 min in a scintillation counter.

*Knockdown of Zip14 using siRNA*—Lipofectamine RNAiMAX transfection reagent (Invitrogen) was used to transfect siRNA specific for human Zip14 (Dharmacon/Thermo Scientific) or negative control siRNA into cells at final concentration of 10 nM following the manufacturer's instructions. Briefly, 2 μl Lipofectamine RNAiMAX and 12 pmol RNAi duplex were mixed in 200 μl Opti-MEM medium and added into each well of a 12-well plate. After incubation at room temperature for 15 min, ~2 x 10<sup>5</sup> cells in 1 ml MEM supplemented with 1.0 mM sodium pyruvate, 0.1 mM nonessential amino acids and 10% FBS were added to each well. Three days later, Zip14 protein levels were detected using immunoblots to determine the efficiency of knockdown.

*Western blotting*—Cells were washed with cold PBS twice and lysed on ice in NET-Triton buffer (150 mM NaCl, 5 mM EDTA, 10 mM Tris, 1% Triton X-100, pH 7.4) with 1 x Complete Mini Protease Inhibitor Cocktail (Roche Applied Science) and 1 mM phenylmethylsulfonyl fluoride (PMSF). The cell lysate was centrifuged at 16,000 x g for 5 min, and the supernatant was kept. Protein concentrations of the cell extracts were measured using the BCA Protein Assay (Pierce). The cell extracts were reduced and denatured with Laemmli buffer for 5 min at 95 °C and subjected to SDS-PAGE on 12% gels. Protein was transferred to nitrocellulose. Immunoblot analysis was carried out using rabbit anti-Zip14 (1:2,000) and mouse anti-actin (1:10,000, Sigma) followed by goat anti-rabbit or anti-mouse secondary antibodies conjugated to horseradish peroxidase (1:10,000, Chemicon, Temecula, CA). Bands were detected by enhanced chemiluminescence (SuperSignal West Pico, Thermo Scientific).

Supplemental Figure S1

A

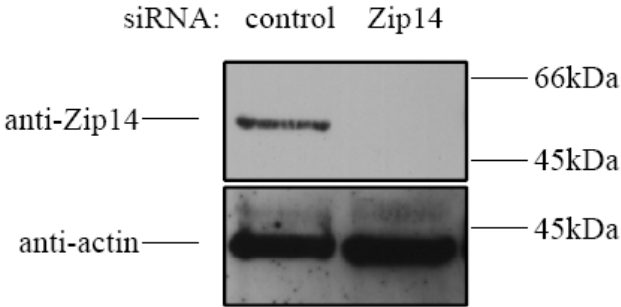

B

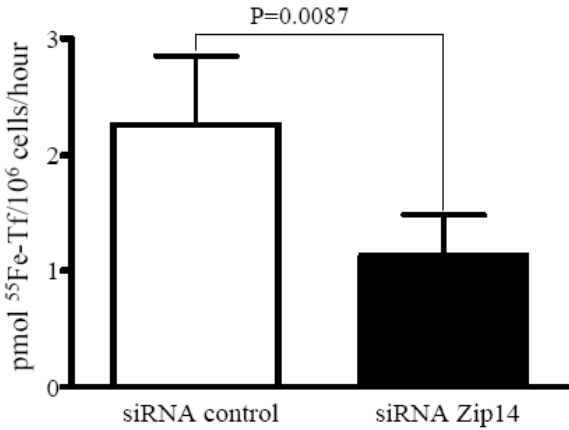

Supplemental Table 1

**Table 1.** List of primers used for PCR to generate and screen for endogenous Zip14-3×Flag in HepG2 cells.

| <b>Primer set</b>    | <b>Forward primer</b>                  | <b>Reverse primer</b>                   |
|----------------------|----------------------------------------|-----------------------------------------|
| Primers for knock-in |                                        |                                         |
| Left arm             | 5'-GGGAAAGUGCAACCTTGAACCTCCGGAGC-3'    | 5'-GGAGACAUTCCCAATCTGGATCTGTCCTGAAT-3'  |
| Right arm            | 5'-GGTCCAUGGCTCTGCCAAGAGCCTG-3'        | 5'-GGCATAGUGCACCCCATTTCTACAAGTCAGC-3'   |
| Cre-specific primers | 5'-ATATTGCGGCCGCAAGCTTGGCCATTGCATAC-3' | 5'-AATAAGCGGCCGCCGCGTTAATGGCTAATCGCC-3' |
| Screening primers    | P1: 5'-CCATTCAGCGTTTTTAAGGGGGC-3'      | P2: 5'-GTTGTGCCCAGTCATAGCCG-3'          |
|                      | P3: 5'-GGATTCATCGACTGTGGCCG-3'         | P4: 5'-CAAGGGCTCCACAGTGGCTAAG-3'        |
|                      | P5: 5'-GGCCTCCTGACTGGATTACC-3'         | P6: 5'-GAGACTGGTTACCAGGGCAGC-3'         |
|                      |                                        |                                         |
